# Supplementary material for: OATD-02 Validates the Benefits of Pharmacological Inhibition of Arginase 1 and 2 in Cancer
Source: MDPI journal article supplement (doi:10.3390/cancers14163967), 2022-08-17
Supplement: s1 [file s1]

## Supplementary Materials

Western blots for K562 cell lysate showing ARG1 and ARG2 bands with densitometry readings were shown in Figure S1.

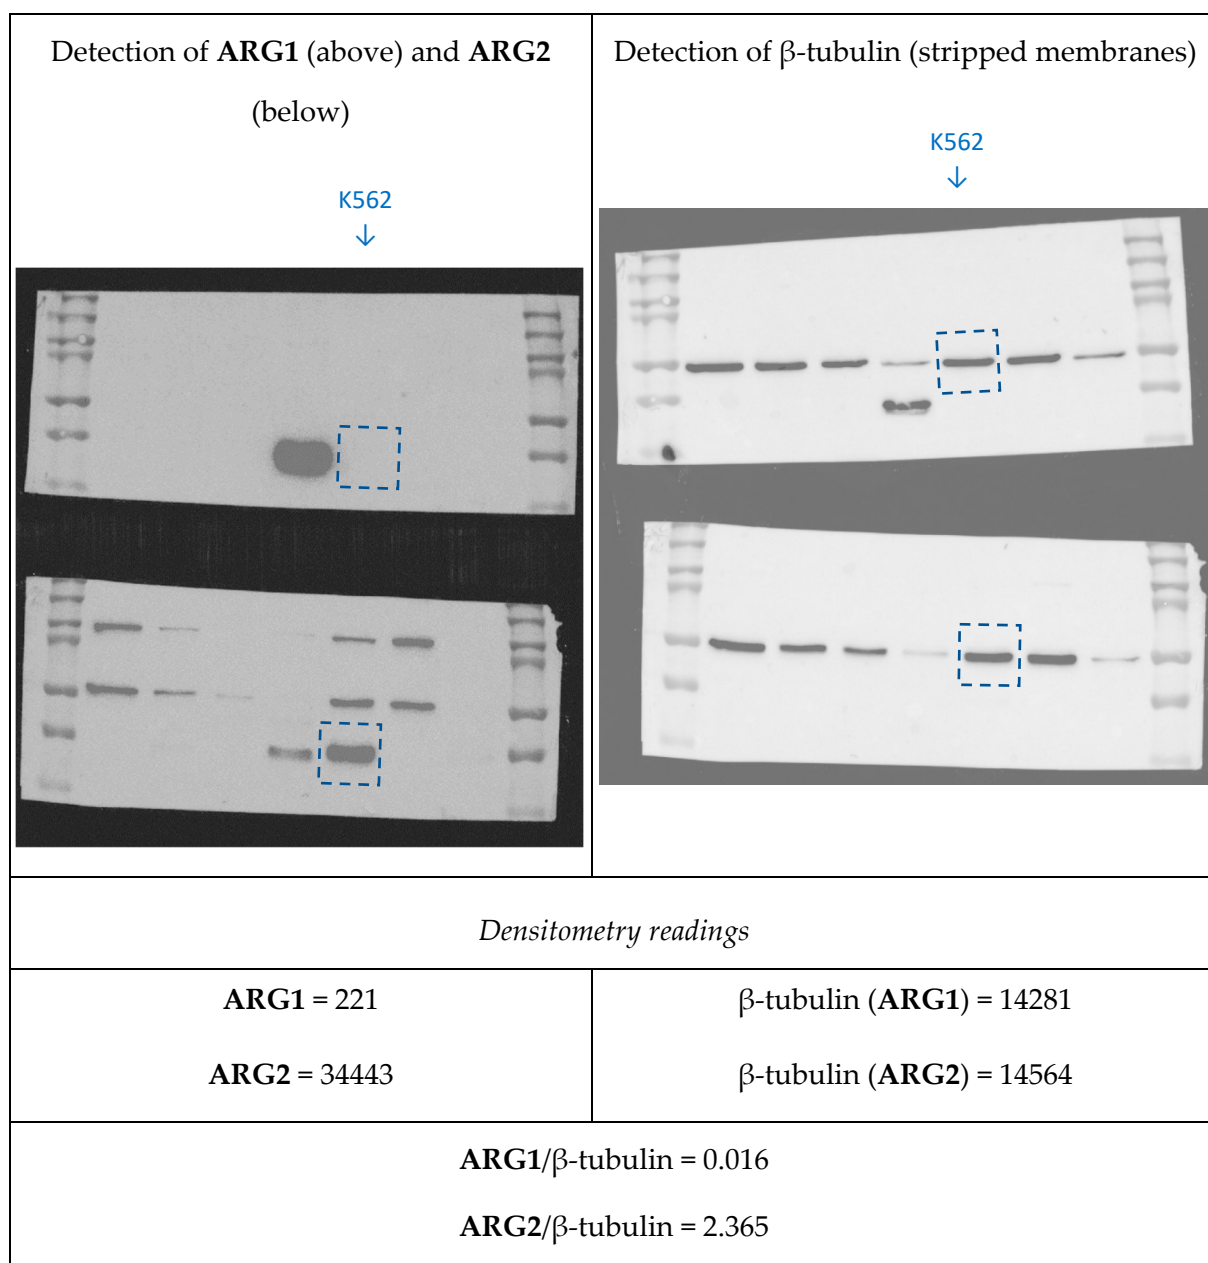

**Figure S1.** ARG1 and ARG2 expression (left panel) was confirmed in K562 cell lysate by SDS-PAGE and western blotting with specific antibodies; after stripping, detection of  $\beta$ -tubulin (right panel) was performed.
